# Supplementary material for: Trypanosoma Cruzi Presenilin-like Transmembrane Aspartyl Protease: Characterization and Cellular Localization
Source: Preprints.org preprint supplement (doi:10.20944/preprints202010.0346.v1), 2020-10-16
Supplement: Supplementary file 1 [file supplementary]

## Supplementary Material

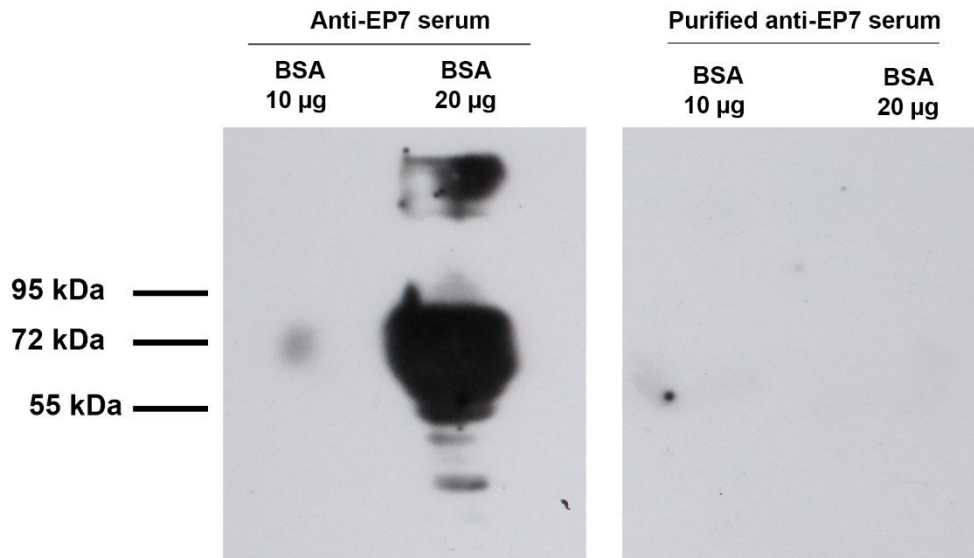

**Figure S1:** Western blot analysis of rabbit anti-EP7 depleted of antibodies anti-BSA in a Sepharose-BSA column. SDS-PAGE (10%) of BSA (10 and 20 µg) under reducing conditions, revealed by chemiluminescence using anti-EP7 peptide polyclonal rabbit sera before and after purification in Sepharose-BSA column.

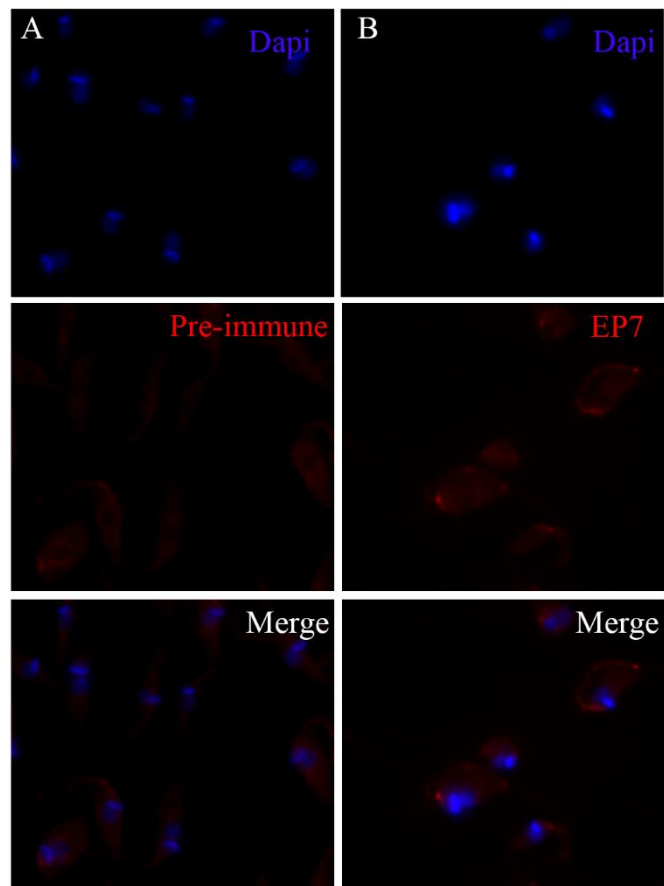

**Figure S2:** Immunofluorescence of *T. cruzi* epimastigotes, cultivated in BHI medium supplemented with 10% FBS, using rabbit anti-EP7 sera and pre-immune sera (A) Parasites were incubated overnight with pre-immune sera (red, Panel A), anti-EP7 (red, Panel B).

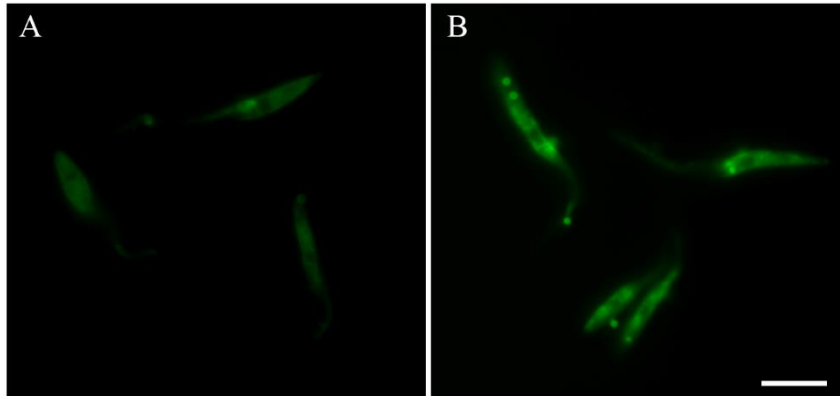

**Figure S3:** Autophagic vacuoles labeled with monodansylcadaverine (MDC) increase during epimastigotes serum deprivation. (A) Labeling of autophagic vacuoles in epimastigotes cultivated in BHI medium supplemented with 10% FBS under standard conditions. (B) Epimastigotes incubated in BHI medium without FBS for 24 hours, showing numerous of MDC-labeled vesicles. Bars=10  $\mu$ m.
